# Supplementary material
Source: PubMed Central journal article supplement (PMC5982596)
Supplement: NIHMS970082-supplement-esi.pdf [file NIHMS970082-supplement-esi.pdf]

## Supplementary Information

### Electrically Controlled Drug Release Using pH-Sensitive Polymer Films

S. Ephraim Neumann, Christian F. Chamberlayne, Richard N. Zare\*

\*Correspondence to:

Dr. Richard N. Zare  
Stanford University  
Department of Chemistry  
333 Campus Drive - Room 133  
Stanford, CA 94305-5080, USA  
Tel: +1-650-723-3062  
Email: [rnz@stanford.edu](mailto:rnz@stanford.edu)

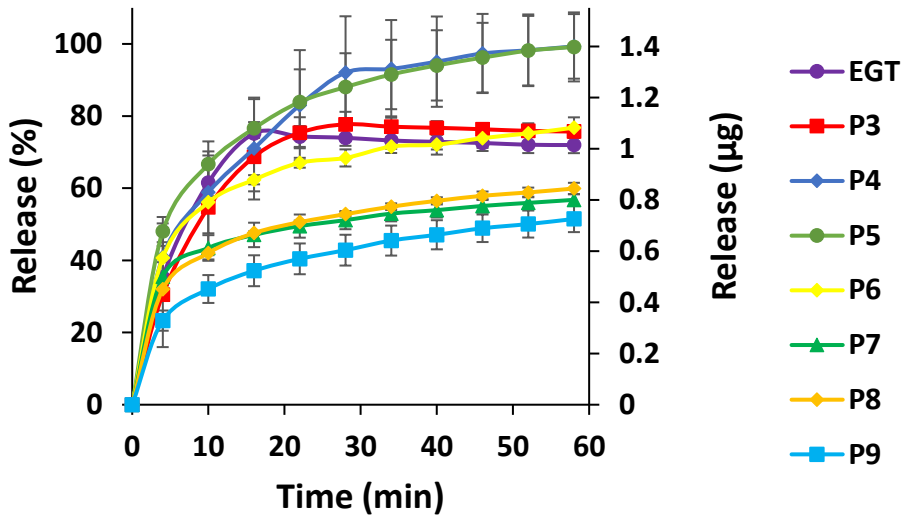

**Supplementary Figure 1:** Release of FL for EGT and every synthesized *co*-PMMA with FL as drug surrogate for 10 pulses of -1.5 V for 20 s each every 6 min.

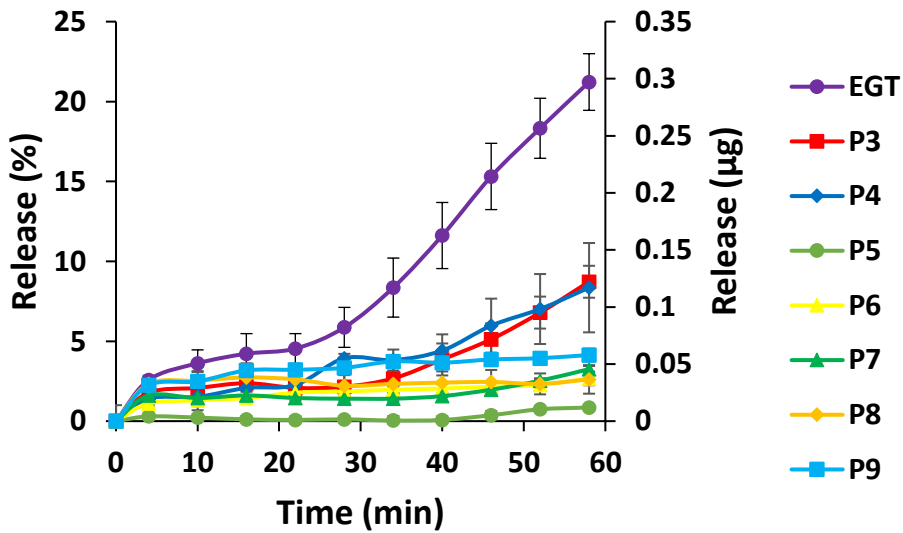

**Supplementary Figure 2:** Leakage of FL for EGT and every synthesized *co*-PMMA with FL as drug surrogate for an hour, measured every 6 min.

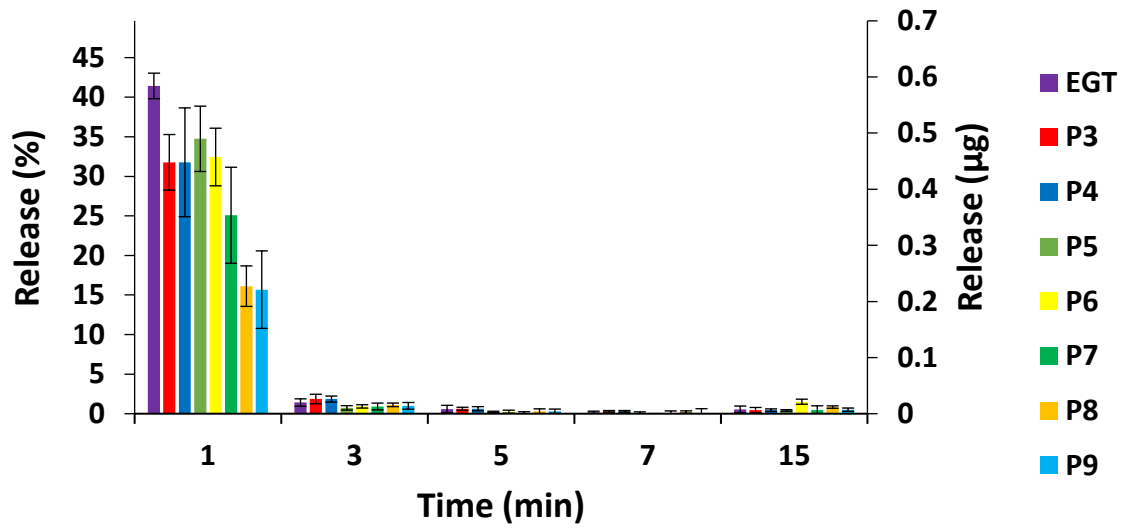

**Supplementary Figure 3:** Timed release pattern of FL after a single electric stimulus of -1.5 V for 60 s for every synthesized co-PMMA.

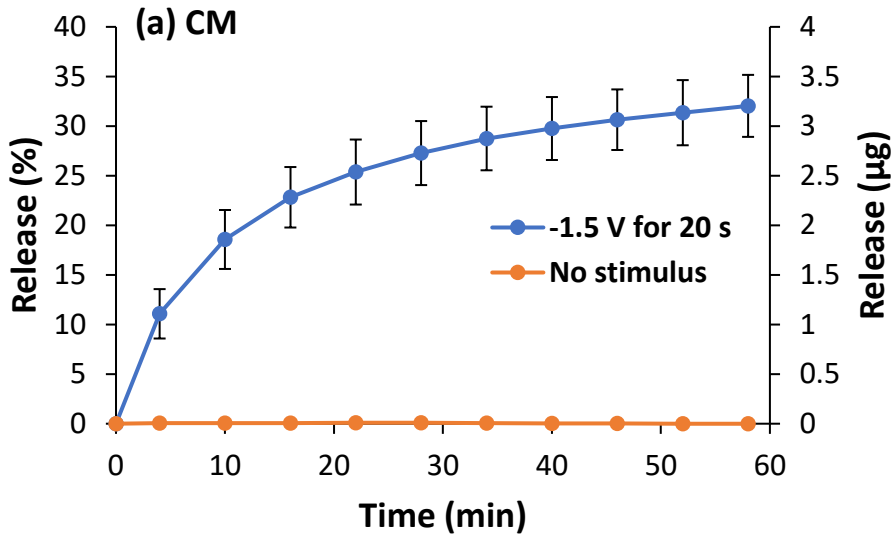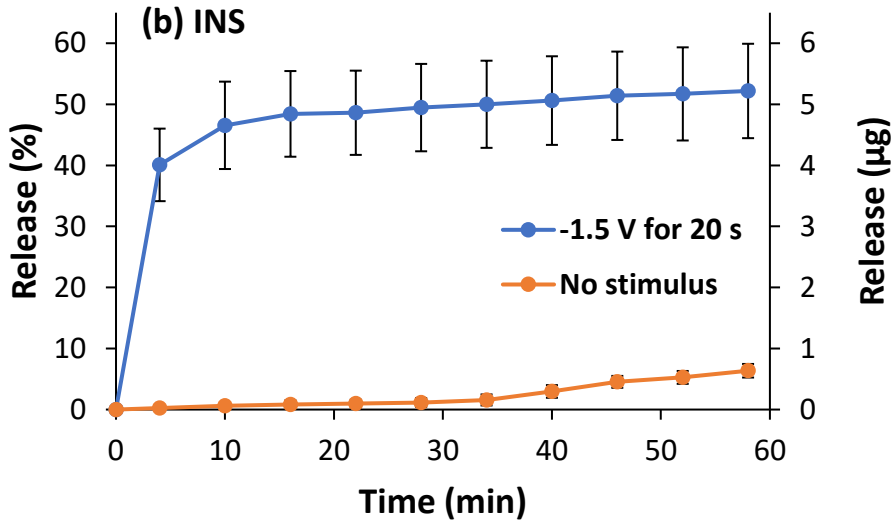

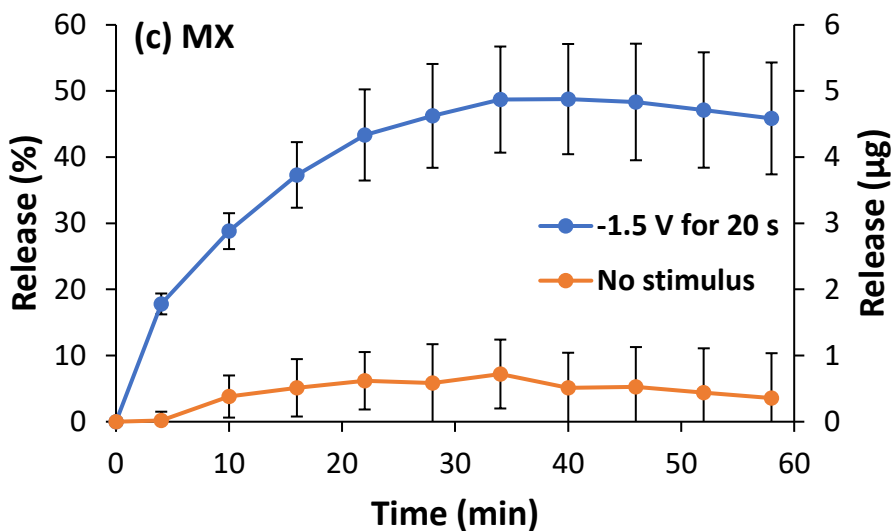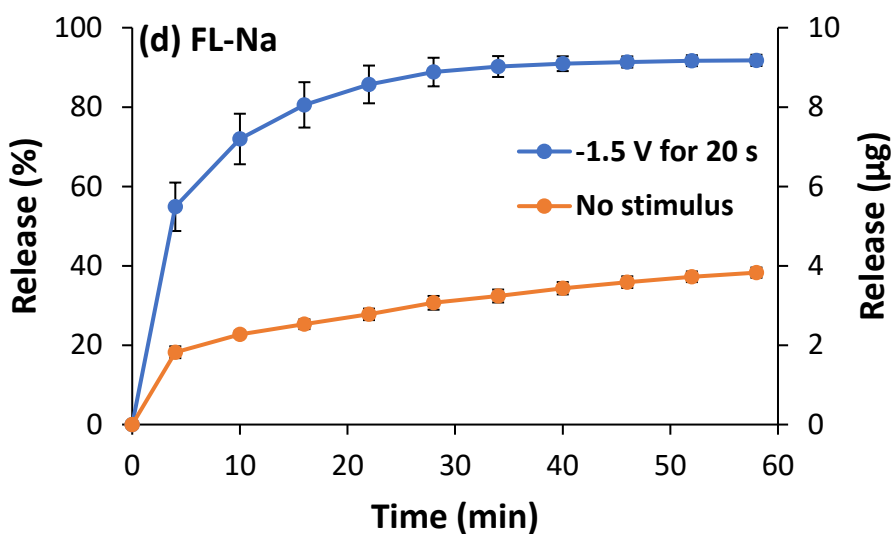

**Supplementary Figure 4:** Pulsed release and leakage with -1.5 V for 20 s each of (a) CM, (b) INS, (c) MX, and (d) FL-Na with P5 as carrier-polymer.

**Supplementary Table 1:** Molar masses ( $M_w$  and  $M_z$ ) for EGT and every synthesized *co*-PMMA, measured by GPC.

| Polymer                   | Eudragit                                 | P3                                       | P4                                       | P5                                       | P6                                       | P7                                       | P8                                       | P9                                       |
|---------------------------|------------------------------------------|------------------------------------------|------------------------------------------|------------------------------------------|------------------------------------------|------------------------------------------|------------------------------------------|------------------------------------------|
| Ratio (AA:MMA)            | 1:2                                      | 1:3                                      | 1:4                                      | 1:5                                      | 1:6                                      | 1:7                                      | 1:8                                      | 1:9                                      |
| $M_w / \text{g mol}^{-1}$ | $1.816 \cdot 10^5$<br>( $\pm 0.200 \%$ ) | $7.374 \cdot 10^4$<br>( $\pm 0.226 \%$ ) | $6.959 \cdot 10^4$<br>( $\pm 0.332 \%$ ) | $5.734 \cdot 10^4$<br>( $\pm 0.409 \%$ ) | $5.256 \cdot 10^4$<br>( $\pm 0.433 \%$ ) | $5.129 \cdot 10^4$<br>( $\pm 0.604 \%$ ) | $5.167 \cdot 10^4$<br>( $\pm 0.237 \%$ ) | $5.894 \cdot 10^4$<br>( $\pm 0.183 \%$ ) |
| $M_z / \text{g mol}^{-1}$ | $1.506 \cdot 10^6$<br>( $\pm 0.486 \%$ ) | $2.257 \cdot 10^5$<br>( $\pm 0.565 \%$ ) | $2.956 \cdot 10^5$<br>( $\pm 0.911 \%$ ) | $1.509 \cdot 10^5$<br>( $\pm 1.195 \%$ ) | $1.430 \cdot 10^5$<br>( $\pm 1.182 \%$ ) | $1.386 \cdot 10^5$<br>( $\pm 1.524 \%$ ) | $1.373 \cdot 10^5$<br>( $\pm 0.561 \%$ ) | $1.591 \cdot 10^5$<br>( $\pm 0.468 \%$ ) |
